1 **Incidence Rates of Medically Attended COVID-19 in Infants Less than 6 Months of Age**

2  
3 Isabel Griffin, PhD, MPH<sup>a</sup>, Stephanie A. Irving, MHS<sup>b</sup>, Carmen Sofia Arriola, PhD<sup>a</sup>, Angela P.  
4 Campbell, MD, MPH<sup>a</sup>, De-Kun Li, MD, PhD<sup>c</sup>, Fatimah S. Dawood, MD<sup>a</sup>, Caroline Doughty-  
5 Skierski<sup>d</sup>, Jeannette R. Ferber, MPH<sup>c</sup>, Nickolas Ferguson<sup>e</sup>, Louise Hadden<sup>e</sup>, Jillian T.  
6 Henderson<sup>b</sup>, Mary Juergens<sup>e</sup>, Venkatesh Kancharla<sup>d</sup>, Allison L. Naleway<sup>b</sup>, Gabriella Newes-  
7 Adeyi<sup>e</sup>, Erin Nicholson<sup>d</sup>, Roxana Odouli, MSPH<sup>c</sup>, Lawrence Reichle<sup>e</sup>, Mo Sanyang<sup>d</sup>, Kate  
8 Woodworth, MD, MPH<sup>a</sup>, Flor M. Munoz<sup>d</sup>

9  
10 **Affiliations:**

11 <sup>a</sup>Centers for Disease Control and Prevention, Atlanta, Georgia; and

12 <sup>b</sup>Center for Health Research, Kaiser Permanente Northwest, Portland, Oregon; and

13 <sup>c</sup>Kaiser Permanente Northern California, Oakland, California; and

14 <sup>d</sup>Baylor College of Medicine, Houston, Texas; and

15 <sup>e</sup>Abt Associates, Inc, Rockville, MD

16

17

18 **Address correspondence to:** Carmen Sofia Arriola, Influenza Division, Centers for Disease  
19 Control and Prevention, 1600 Clifton Rd MS A-32, Atlanta, GA 30329, United States;  
20 telephone: (404) 718-4589; fax (404) 639-3866; email: wus3@cdc.gov.

21

22 **Short title:** Incidence Rates of COVID-19 in Infants

23

24 **Conflict of Interest Disclosures (includes financial disclosures):** Author A. Naleway reports  
25 institutional support from Pfizer and Vir Biotechnology. All other authors have indicated that  
26 they have no conflicts of interest or financial relationships relevant to this article to disclose.

27

28 **Other Disclosures:** The findings and conclusions in this report are those of the authors and do  
29 not necessarily represent the official position of the Centers for Disease Control and Prevention  
30 (CDC).

31

32 **Funding/Support:** This study was funded by the US Centers for Disease Control and  
33 Prevention (CDC) through Contract # 75D30120C08150 with Abt Associates.

34

35 **Role of Funder/Sponsor:** This study was funded by the US Centers for Disease Control and  
36 Prevention (CDC). CDC-affiliated authors were involved in study design, data collection,  
37 analysis and interpretation, report writing, and the decision to submit the paper for  
38 publication. The corresponding author had full access to all data used in the analysis and had  
39 final responsibility for the decision to submit for publication.

40

41 **Abbreviations:** COVID-19—coronavirus disease 2019, SARS-CoV-2 – severe acute  
42 respiratory syndrome coronavirus 2, RT-PCR—Reverse Transcription Polymerase Chain  
43 Reaction.

44

45

46 **Article Summary**

47 This report describes incidence rates and characteristics of medically attended outpatient and  
48 inpatient COVID-19 episodes among infants aged <6 months during the COVID-19 pandemic.

49

50 **What's Known on This Subject**

51 Surveillance data and case series suggest that infants aged <1 year may be more likely to be  
52 hospitalized with COVID-19 than older children, but few data are available about the risk of  
53 medically attended COVID-19 episodes among infants.

54

55 **What this Study Adds**

56 Among infants aged <6 months, few were hospitalized with COVID-19. Incidence rates of  
57 medically attended COVID-19 episodes were highest among infants aged  $\leq 1$  month and among  
58 infants of women with COVID-19 during the 6 month post-partum period.

59

60

61

62

63

64

**Contributors' Statement Page**

65

66 Dr. Dawood, Dr. Arriola, Dr Campbell, Dr Li, Dr Henderson, Ms. Irving, Dr. Naleway, Dr.  
67 Munoz, and Dr. Nicholson conceptualized and designed the study and data collection  
68 procedures.

69

70 Dr. Woodworth conceptualized and designed the analysis, drafted the initial manuscript, and  
71 reviewed and revised the manuscript.

72

73 Dr. Griffin conceptualized and designed the analysis, carried out all analyses, drafted the initial  
74 manuscript, and reviewed and revised the manuscript.

75

76 Ms. Doughty-Skierski, Ms. Ferber, Mr. Kancharla, Ms. Irving, Ms. Odouli, Mr Sanyang, Dr.  
77 Newes-Adeyi, Ms. Juergens, Mr. Ferguson, Ms. Hadden and Mr. Reichle collected data and  
78 provided data for this analysis.

79

80 All authors critically reviewed and revised the manuscript, approved the final manuscript as  
81 submitted and agree to be accountable for all aspects of the work.

82

83

84

85

86

87

88

89

90

91

92 **Abstract**

93

94 **Objective**

95 Studies suggest infants may be at increased risk of severe COVID-19 relative to older children,  
96 but few data exist regarding the incidence of COVID-19 episodes and associated risk factors. We  
97 estimate incidence rates and describe characteristics associated with medically attended COVID-  
98 19 episodes among infants younger than 6 months of age.

99

100 **Methods**

101 We analyzed electronic medical record data from a cohort of infants born March 1, 2020–  
102 February 28, 2021. Data from three health care delivery systems included demographic  
103 characteristics, maternal and infant outpatient visit and hospitalization diagnoses, and SARS-  
104 CoV-2 test results. Medically attended COVID-19 episodes were defined by positive SARS-  
105 CoV-2 clinical tests and/or COVID-19 diagnosis codes during medical care visits. Unadjusted  
106 and site-adjusted incidence rates by infant month of age, low and high SARS-CoV-2 circulation  
107 periods and maternal COVID-19 diagnosis were calculated.

108

109 **Results**

110 Among 18,192 infants aged <6 months whose mothers received prenatal care within the three  
111 systems, 173 (1.0%) had medically attended COVID-19 episodes. Incidence rates were highest  
112 among infants aged under 1 month (2.0 per 1,000 person-weeks) and 1 month (2.0 per 1,000  
113 person-weeks) compared with older infants. Incidence rates were also higher for infants born to  
114 women with postpartum COVID-19 compared with women without known COVID-19 and  
115 women diagnosed with COVID-19 during pregnancy.

116

117 **Conclusion**

118 Most medically attended COVID-19 episodes in infants aged <6 months were outpatient care  
119 encounters. Infants of women with postpartum COVID-19 had a higher risk of medically attended  
120 COVID-19 than infants born to mothers who were diagnosed during pregnancy or never diagnosed  
121 underscoring the importance of COVID-19 prevention measures for their household members and  
122 caregivers to prevent infections in infants.

123

124

125 Early in the coronavirus disease 2019 (COVID-19) pandemic, surveillance data  
126 suggested that COVID-19 was infrequent and mild in children but that hospitalization rates  
127 among infants aged <1 year might be higher than among older children.<sup>1</sup> More recent studies  
128 suggest that infants aged less than one year of age primarily experience mild to moderate  
129 COVID-19, but represent a disproportionate amount of pediatric COVID-19 associated  
130 hospitalizations.<sup>2,3,4,5,6</sup> However, most published studies to date describing severe acute

131 respiratory syndrome-related coronavirus (SARS-CoV-2) infection among infants are based on  
132 convenience samples with small numbers of infants that preclude examining outcomes by age  
133 group and lack population denominators that allow an assessment of true community risk.  
134 Estimates of incidence rates of medically attended COVID-19 episodes among infants, including  
135 outpatient care encounters, could help guide risk communication for expectant and new parents  
136 and might inform future public health recommendations for this group.

137         The Epidemiology of SARS-CoV-2 in Pregnancy and Infancy (ESPI) Network: Electronic  
138 Cohort (eESPI) collected electronic medical record data for a retrospective cohort of pregnant  
139 persons and their infants who were born during the COVID-19 pandemic. Data about infants were  
140 collected up until the date they turned six months old. We analyzed data from the eESPI pregnancy  
141 and infant cohort to describe infants <6 months of age with and without medically attended  
142 COVID-19 episodes including both hospitalizations and outpatient care encounters (including  
143 urgent care and emergency department encounters). Additionally, we estimated incidence rates of  
144 medically attended COVID-19 episodes overall and by level of SARS-CoV-2 circulation, site, age  
145 group, and maternal COVID-19 diagnosis during pregnancy and the six month postpartum period.

146

## 147 METHODS

### 148 Study design and population

149         The eESPI study was conducted at three healthcare delivery systems in the United States:  
150 Kaiser Permanente Northwest (Portland, OR), Kaiser Permanente Northern California (Oakland,  
151 CA), and Baylor College of Medicine (Houston, TX). Persons were eligible for inclusion in the  
152 maternal cohort if they 1) had an estimated delivery date (EDD) from March 1, 2020 through  
153 February 28, 2021 excluding women with pregnancy losses that occurred prior to March 1, 2020

154 and 2) had at least one prenatal care outpatient or telemedicine visit within the respective health  
155 system from December 1, 2019 through February 28, 2021. The infant cohort included all live  
156 born infants of individuals included in the maternal cohort. This analysis included all infants  
157 born from March 1, 2020 through February 28, 2021.

### 158 Data collection

159 Data were extracted from electronic medical records using standardized variable  
160 definitions across study sites (see Supplemental Methods Data Dictionary – Appendix A and  
161 Appendix B). Most variables were defined by one or more International Classifications of  
162 Diseases 10 (ICD-10) codes. Data collection included maternal and infant demographic  
163 characteristics, maternal prenatal visit history, maternal and infant medical conditions, diagnosis  
164 codes for all telemedicine, emergency department (ED), and ambulatory care encounters and  
165 hospitalizations, and results from all SARS-CoV-2 RT-PCR testing. For this study, data about  
166 infants were collected from birth until they turned six months of age or their age as of February  
167 28, 2021, whichever occurred first.

### 168 Analysis definitions

169 All variables derived from ICD-10 codes can be found in Appendix A and Appendix B.  
170 Medically attended COVID-19 episodes in infants, including telemedicine, ED, and ambulatory  
171 care encounters, were identified based on at least one of the following: 1) a positive RT-PCR test  
172 for SARS-CoV-2 within three days of a medical encounter, or 2) a COVID-19 diagnostic code  
173 (ICD-10: U07.1) (Appendix A). Hospitalizations for any reason were counted if they met the test  
174 and diagnostic criteria described above.

175 Maternal race/ethnicity was extracted from electronic medical records and classified as  
176 Hispanic/Latina, non-Hispanic White, non-Hispanic Black, and non-Hispanic Other. The non-  
177 Hispanic Other race/ethnicity category included American Indian or Alaska Native, Asian,  
178 Native Hawaiian or Pacific Islander, and women who had more than one race listed in their  
179 medical record. A list of conditions determined to be underlying medical conditions for mothers  
180 and infants can be found in the Supplemental Methods Data Dictionary (Appendix B). Timing of  
181 underlying medical conditions for infants was based on timing relative to any COVID-19  
182 diagnosis or positive test. Timing of COVID-19 for mothers was determined based on either a  
183 documented positive RT-PCR or antigen test for SARS-CoV-2 or COVID-19 diagnostic code  
184 during pregnancy or during the postpartum period (two mothers had COVID-19 documented  
185 during both pregnancy and the postpartum period). The postpartum period was defined as the six  
186 months immediately following delivery.

187 Gestational age at delivery (preterm [ $<37$  weeks] or term/post-term [ $\geq 37$  weeks]) was  
188 determined using reported gestational age at delivery or derived from delivery date and estimated  
189 date of conception (Appendix A). High and low SARS-CoV-2 circulation weeks were defined  
190 for each site as weeks with case counts above the median case count (high) or below the median  
191 case count (low) for the study period, using Health and Human Services (HHS) representative  
192 county-level surveillance data for Texas (Harris County), Oregon (Multnomah County), and  
193 California (Santa Clara County) in each health system's service area.<sup>7</sup>

194

195 Analysis

196           Frequencies of maternal and infant characteristics were described for infants with and  
197 without medically attended COVID-19 episodes. Available characteristics of interest included  
198 maternal race/ethnicity, maternal Medicaid status, maternal COVID-19 diagnosis (during  
199 pregnancy, during the six month postpartum period, or both during pregnancy and the postpartum  
200 period), gestational age at birth, infant sex, presence of any underlying medical conditions for  
201 mother and infant, and site. Unadjusted chi-square and fisher's exact test p-values of  $\leq 0.05$  were  
202 considered statistically significant.

203           For incidence rate calculations, an aggregate crude incidence rate for the full cohort was  
204 calculated with the total number of infants with medically attended COVID-19 episodes as the  
205 numerator and the total number of person-weeks at risk that each infant (those with and without  
206 medically attended COVID-19 episodes) was in the cohort as the denominator. Site-adjusted  
207 negative binomial models were then used to estimate incidence per 1,000 person-weeks and  
208 95% confidence intervals by infant sex, maternal race/ethnicity, maternal Medicaid status,  
209 presence of any underlying medical conditions for mother and infant, age in months (<1 month,  
210 1 month, 2 months, 3 months, 4 months, and 5 months of age), maternal SARS-CoV-2 infection  
211 status (no infection, infection during pregnancy or infection during the six-month postpartum  
212 period), and low or high SARS-CoV-2 circulation in the community.

213 All analyses were conducted in SAS Version 9.4.

#### 214 *Ethical Review*

215 This protocol was reviewed by the Institutional Review Boards of participating sites. This  
216 activity was reviewed by CDC and was conducted consistent with applicable federal law and  
217 CDC policy.

218

## 219 RESULTS

220       Among 18,192 infants aged less than six months of age in the cohort, 173 (1.0%) had  
221 medically attended COVID-19 episodes, including 114 (65.9%) identified by positive SARS-CoV-  
222 2 laboratory testing and 59 (34.1%) by COVID-19 diagnosis code only without a documented  
223 laboratory-test in the medical record. Medically attended COVID-19 episodes were more frequent  
224 among infants from site B (1.4% of 7,434 infants) compared with those from sites A and C (site A  
225 0.8% of 4,794 infants and site C 0.5% of 5,964 infants) (Table 1). There were no differences  
226 between infants with versus without medically attended COVID-19 episodes by infant sex or  
227 gestational age at birth. However, compared to infants without medically attended COVID-19, a  
228 larger proportion of infants with medically attended COVID-19 episodes were infants of Hispanic  
229 mothers (46.8% vs. 27.9%, <0.0001), Medicaid beneficiaries (29.5% vs. 22.4%, p=0.05), and  
230 mothers with postpartum COVID-19 (57.2% vs. 1.5%, p≤0.0001). Of the 173 infants with  
231 medically attended COVID-19 episodes, 27 (15.6%) were diagnosed at <1 month of age, 29  
232 (16.7%) at 1 month of age, 28 (16.2%) at 2 months, 16 (9.2%) at 3 months, 31 (17.9%) at 4 months,  
233 and 42 (24.3%) at 5 months of age. A larger proportion of infants with medically attended COVID-  
234 19 episodes also had any underlying medical condition (12.1% vs. 7.3%, p=0.02). Six of 173  
235 infants with medically attended COVID-19 (3.5%) had an underlying heart-related condition, 11  
236 (6.4%) had an underlying lung-related condition, and 1 (0.6%) had a liver-related condition  
237 (Appendix A); all conditions were documented prior to or on the same days as the infant's COVID-  
238 19 diagnosis or positive SARS-CoV-2 test result.

239       Among the 173 infants with medically attended COVID-19 episodes, 148 (85.6%) were  
240 first diagnosed in association with telemedicine visits, 20 (11.6%) during ambulatory/outpatient  
241 visits, one (0.6%) during an emergency room visit, and four (2.3%) during hospitalization (data



242 not shown). All four hospitalizations occurred among infants aged 0-1 month. Hospital lengths of  
243 stay ranged from 2-5 days, and none included intensive care unit admission, mechanical  
244 ventilation, or extracorporeal membrane oxygenation.

245

#### 246 *Incidence of Medically Attended COVID-19 Episodes*

247 The overall cumulative incidence of medically attended COVID-19 episodes was 0.95%.

248 The aggregate crude incidence rate among the full cohort was 0.6 per 1,000 person-weeks. Site-

249 adjusted incidence rates of medically attended COVID-19 episodes varied by local SARS-CoV-2

250 COVID-19 circulation (high versus low), infant age, maternal race/ethnicity, maternal Medicaid

251 status, infant underlying conditions, and maternal COVID-19 diagnosis (Table 2). The overall site-

252 adjusted incidence rates of medically attended COVID-19 episodes were 0.6 per 1,000 person-

253 weeks during high SARS-CoV-2 circulation periods and 0.4 per 1,000 person-weeks during low

254 circulation periods. By infant age, the site-adjusted incidence rates of medically attended COVID-

255 19 episode were highest among infants under 1 month and 1 month of age (2.0 and 2.0 per 1,000

256 person-weeks, respectively) compared with older infants.

257 Infants born to mothers with COVID-19 diagnosed during the six-month postpartum period

258 had a higher incidence rate of medically attended COVID-19 episodes (12.5 per 1,000 person-

259 weeks) than infants born to mothers diagnosed with COVID-19 during pregnancy alone (0.5 per

260 1,000 person-weeks) and compared to infants born to mothers who were never diagnosed with

261 COVID-19 during pregnancy or the postpartum period (0.2 per 1,000 person-weeks).

262

263 DISCUSSION

264           Among a cohort of >18,000 infants born during the first year of the COVID-19 pandemic  
265   in the United States and followed up to six months of age, the overall cumulative incidence of  
266   medically attended COVID-19 episodes was 0.95%. Incidence rates varied by level of community  
267   transmission, maternal COVID-19 status, maternal race/ethnicity, and infant month of age. The  
268   majority of medically attended COVID-19 episodes were outpatient encounters, largely  
269   comprising telemedicine visits, and only four infants (<0.1% of the cohort) during their first month  
270   of life had COVID-19 associated hospitalizations. Findings from this analysis provide reassurance  
271   that the overall risk of medically attended COVID-19 episodes among young infants was low  
272   during the study period, which preceded the emergence of both the Delta and Omicron variants,  
273   and risk of COVID-19-associated hospitalizations was very low for this group. Incidence rates of  
274   medically attended COVID-19 episodes were higher among infants of women with COVID-19  
275   diagnosed during the six-month postpartum period compared to infants born to mothers diagnosed  
276   at other times or never diagnosed suggesting potential horizontal transmission between mother and  
277   infant and increasing opportunities for community acquisition with increasing infant age. This  
278   finding underscores the importance of COVID-19 prevention measures for household members  
279   and caregivers of young infants to reduce transmission to young infants. In addition, the highest  
280   incidence rates of medically attended COVID-19 episodes were among infants born to Hispanic  
281   (0.9 per 1,000 person-weeks) and Non-Hispanic Black mothers (0.9 per 1,000 person-weeks) after  
282   adjusting for study site, a finding consistent with those from other studies documenting disparities  
283   related to COVID-19 disease burden among minority populations during this study period.<sup>8,9,10,11</sup>

284           Findings from this analysis suggest that the risk of medically attended COVID-19 episodes  
285   among infants in the United States was low during the first year of the pandemic. We were not  
286   able to assess the influence of community exposures or preventive practices on incidence rate of

287 medically attended COVID-19 episodes among young infants. However, our finding that incidence  
288 rates of medically attended COVID-19 episodes were higher among infants of mothers diagnosed  
289 with COVID-19 during the six-month postpartum period suggest that SARS-CoV-2 transmission  
290 within households and from caregivers may be important sources of infection for young infants.  
291 To reduce the risk of SARS-CoV-2 infection and subsequent medically attended COVID-19  
292 episodes among infants, infection prevention counseling for families and caregivers of young  
293 infants should include information about the importance of non-pharmaceutical prevention  
294 measures such as handwashing and mask wearing and the benefits of COVID-19 vaccination  
295 among eligible persons. Maternal COVID-19 vaccination (either during or prior to pregnancy)  
296 may decrease SARS-CoV-2 infection among infants by passive transfer of maternal antibodies to  
297 infants and by preventing maternal infections during the postpartum period.<sup>12,13,14,15</sup> Maternal  
298 vaccination during pregnancy has an estimated 61% effectiveness against COVID-19  
299 hospitalization in infants aged <6 months and maternal COVID-19 vaccination is recommended  
300 by both CDC and the American College of Obstetricians and Gynecologists (ACOG).<sup>16,17,18</sup> Other  
301 family members and caregivers should also be encouraged to receive COVID-19 vaccine to reduce  
302 their risk of SARS-CoV-2 infection and subsequent transmission to young infants in their care.

303       Infants with medically attended COVID-19 episodes had more underlying medical  
304 conditions diagnosed during the first six months of life compared with infants without COVID-  
305 19, though this difference was small. This finding is consistent with the literature that found  
306 younger children with severe disease were more likely to have underlying conditions.<sup>5,19</sup> This may  
307 be due to increased healthcare seeking behaviors among individuals with medical conditions that  
308 afford more opportunities to get SARS-CoV-2 testing.<sup>20</sup>

309           This analysis has several limitations. First, medically attended COVID-19 episodes were  
310 identified based on clinician-initiated testing and/or ICD-10 codes for COVID-19 which may have  
311 led to under-ascertainment of episodes and/or differential detection of episodes among infants with  
312 different demographic or maternal characteristics. For example, infants of women with COVID-  
313 19 diagnosed during the postpartum period may have been more likely to be tested for SARS-  
314 CoV-2 because they had a known history of exposure to someone with COVID-19. Second, this  
315 analysis was based on data from the first year of the COVID-19 pandemic in the United States and  
316 may not be fully generalizable to subsequent periods of SARS-CoV-2 circulation of emerging  
317 variants during which younger pediatric age groups were increasingly impacted. Third, this  
318 analysis was not able to assess factors that may have led to differences in incidence rates of  
319 medically attended COVID-19 episodes by site, such as differences in SARS-CoV-2 circulation  
320 patterns, clinical testing practices, and demographic characteristics of the source population.  
321 Lastly, the analysis did not account for maternal COVID-19 vaccination status. However, the  
322 frequency of women fully vaccinated in this cohort was likely low since women in this cohort  
323 were pregnant prior to April 2021 when COVID-19 vaccine became available to the general  
324 population of adults <65 years of age in the United States.<sup>21,22</sup>

325

## 326 CONCLUSIONS

327           Among a cohort of infants aged <6 months at three sites in the US during the first year of  
328 the COVID-19 pandemic, the incidence of medically attended COVID-19 episodes was low with  
329 outpatient care encounters accounting for the large majority of episodes. The highest incidence  
330 rates of medically attended COVID-19 episodes occurred among infants in the first two months of  
331 life and among infants of women diagnosed with COVID-19 during the postpartum period. These

332 findings underscore the importance of COVID-19 prevention measures for pregnant women,  
333 household members, and families and caregivers of infants to protect infants who are too young to  
334 receive COVID-19 vaccine.

## Acknowledgements

We express our gratitude to the Epidemiology of SARS-CoV-2 in Pregnancy and Infancy (ESPI) Network: Electronic Cohort (eESPI) team for their tremendous effort in abstracting electronic health record data. The authors at KPNC thank Andrew K. Hirst for his help with programming and technical support, the authors at KPNW acknowledge Elizabeth Shuster and Jan Van Marter. The authors at Baylor College of Medicine acknowledge Nanette Bond and Patricia Santarcangelo. The authors at Abt Associates acknowledge Michael Duckworth and Peiyi Zhang. The authors from CDC acknowledge Michael Daugherty and Kellye Sliger for data management.

## References

1. Dong Y, Mo X, Hu Y, et al. Epidemiology of COVID-19 Among Children in China. *Pediatrics*. 2020;145(6):e20200702. doi:10.1542/peds.2020-0702
2. Liu X, Tang J, Xie R, et al. Clinical and Epidemiological Features of 46 Children <1 Year Old With Coronavirus Disease 2019 in Wuhan, China: A Descriptive Study [published correction appears in *J Infect Dis*. 2021 Feb 13;223(3):540]. *J Infect Dis*. 2020;222(8):1293-1297. doi:10.1093/infdis/jiaa472
3. Ouldali N, Yang D, Madhi F, et al. Factors Associated With Severe SARS-CoV-2 Infection. *Pediatrics*. 2021;147(3):e2020023432. doi:10.1542/peds.2020-023432
4. Neef V, Buxmann H, Rabenau H, Zacharowski K, Raimann F. Characterization of neonates born to mothers with SARS-CoV-2 infection: Review and meta-analysis. *Pediatr Neonatol*. 2021;62(1):11-20. doi:10.1016/j.pedneo.2020.10.001.
5. Hobbs CV, Woodworth K, Young CC, et al. Frequency, Characteristics and Complications of COVID-19 in Hospitalized Infants. *Pediatr Infect Dis J*. 2022;41(3):e81-e86. doi:10.1097/INF.0000000000003435
6. Woodruff RC, Campbell AP, Taylor CA, et al. Risk Factors for Severe COVID-19 in Children [published online ahead of print, 2021 Dec 22]. *Pediatrics*. 2021;e2021053418. doi:10.1542/peds.2021-053418
7. Health and Human Services. Number of COVID-19 cases confirmed by U.S. county & State Health Departments by Report Week. Protect Public Data Hub 2021 [cited 2021 April 8]; Available from: [www.protect.hhs.gov](http://www.protect.hhs.gov).
8. Acosta AM, Garg S, Pham H, et al. Racial and Ethnic Disparities in Rates of COVID-19-Associated Hospitalization, Intensive Care Unit Admission, and In-Hospital Death in the United States From March 2020 to February 2021. *JAMA Netw Open*. 2021;4(10):e2130479. Published 2021 Oct 1. doi:10.1001/jamanetworkopen.2021.30479
9. Centers for Disease Control and Prevention. COVID-19: Risk for COVID-19 Infection, Hospitalization, and Death by Race/Ethnicity. 2022 Feb 1 [cited 2022 March 9]; Available from: <https://www.cdc.gov/coronavirus/2019-ncov/covid-data/investigations-discovery/hospitalization-death-by-race-ethnicity.html>
10. Jacobson M, Chang TY, Shah M, Pramanik R, Shah SB. Racial and Ethnic Disparities in SARS-CoV-2 Testing and COVID-19 Outcomes in a Medicaid Managed Care Cohort. *Am J Prev Med*. 2021;61(5):644-651. doi:10.1016/j.amepre.2021.05.015
11. Yehia BR, Winegar A, Fogel R, et al. Association of Race With Mortality Among Patients Hospitalized With Coronavirus Disease 2019 (COVID-19) at 92 US

- Hospitals. *JAMA Netw Open*. 2020;3(8):e2018039. Published 2020 Aug 3.  
doi:10.1001/jamanetworkopen.2020.18039
12. Rottenstreich A, Zarbiv G, Oiknine-Djian E, Zigran R, Wolf DG, Porat S. Efficient Maternofetal Transplacental Transfer of Anti- Severe Acute Respiratory Syndrome Coronavirus 2 (SARS-CoV-2) Spike Antibodies After Antenatal SARS-CoV-2 BNT162b2 Messenger RNA Vaccination. *Clin Infect Dis*. 2021;73(10):1909-1912. doi:10.1093/cid/ciab266
  13. Beharier O, Plitman Mayo R, Raz T, et al. Efficient maternal to neonatal transfer of antibodies against SARS-CoV-2 and BNT162b2 mRNA COVID-19 vaccine [published correction appears in *J Clin Invest*. 2021 Oct 1;131(19):]. *J Clin Invest*. 2021;131(13):e150319. doi:10.1172/JCI150319
  14. Collier AY, McMahan K, Yu J, et al. Immunogenicity of COVID-19 mRNA Vaccines in Pregnant and Lactating Women. *JAMA*. 2021;325(23):2370-2380. doi:10.1001/jama.2021.7563
  15. Mithal LB, Otero S, Shanes ED, Goldstein JA, Miller ES. Cord blood antibodies following maternal coronavirus disease 2019 vaccination during pregnancy. *Am J Obstet Gynecol*. 2021;225(2):192-194. doi:10.1016/j.ajog.2021.03.035
  16. Halasa NB, Olson SM, Staat MA, et al. Effectiveness of Maternal Vaccination with mRNA COVID-19 Vaccine During Pregnancy Against COVID-19-Associated Hospitalization in Infants Aged <6 Months - 17 States, July 2021-January 2022. *MMWR Morb Mortal Wkly Rep*. 2022;71(7):264-270. Published 2022 Feb 18. doi:10.15585/mmwr.mm7107e3.
  17. Centers for Disease Control and Prevention (CDC). National Center for Immunization and Respiratory Diseases (NCIRD), Division of Viral Diseases. COVID-19 Vaccines While Pregnant or Breastfeeding. December 6, 2021. Retrieved from: <https://www.cdc.gov/coronavirus/2019-ncov/vaccines/recommendations/pregnancy.html> on December 16, 2021.
  18. The American College of Obstetrics and Gynecologists. Practice Advisory: COVID-19 Vaccination Considerations for Obstetric–Gynecologic Care. 2021 Dec 3. [Cited: Dec 16 2021]. Retrieved from: <https://www.acog.org/clinical/clinical-guidance/practice-advisory/articles/2020/12/covid-19-vaccination-considerations-for-obstetric-gynecologic-care> on December 16, 2021.
  19. Kim L, Whitaker M, O'Halloran A, et al. Hospitalization Rates and Characteristics of Children Aged <18 Years Hospitalized with Laboratory-Confirmed COVID-19 - COVID-NET, 14 States, March 1-July 25, 2020. *MMWR Morb Mortal Wkly Rep*. 2020;69(32):1081-1088. Published 2020 Aug 14. doi:10.15585/mmwr.mm6932e3
  20. Lu P, Kong D, Shelley M. Risk Perception, Preventive Behavior, and Medical Care Avoidance among American Older Adults During the COVID-19 Pandemic. *J Aging Health*. 2021;33(7-8):577-584. doi:10.1177/08982643211002084
  21. COVID Data Tracker: COVID-19 vaccination among pregnant people aged 18-49 years overall, by race/ethnicity, and date reported to CDC - Vaccine Safety Datalink, United States. Centers for Disease Control and Prevention. Retrieved from: <https://covid.cdc.gov/covid-data-tracker/#vaccinations-pregnant-women> on January 11, 2022.
  22. Razzaghi H, Meghani M, Pingali C, et al. COVID-19 Vaccination Coverage Among Pregnant Women During Pregnancy - Eight Integrated Health Care Organizations, United

States, December 14, 2020-May 8, 2021. *MMWR Morb Mortal Wkly Rep.* 2021;70(24):895-899. Published 2021 Jun 18. doi:10.15585/mmwr.mm7024e2

**Table 1.** Maternal and Infant Characteristics by whether Infants had Medically Attended Coronavirus Disease (COVID-19) Episodes before 6 Months of Age, Epidemiology of SARS-CoV-2 in Pregnancy and Infancy (ESPI) Network: Electronic Cohort (eESPI) (N= 18,192 infants).

|                                             | Total<br>(N= 18,192)<br><i>n</i> | Infants with<br>Medically<br>Attended<br>COVID-19<br>Episodes<br>(n=173)<br><i>n (row %)</i> | Infants without<br>Medically<br>Attended<br>COVID-19<br>Episodes<br>(n=18,019)<br><i>n (row %)</i> | <i>P</i> <sup>a</sup> |
|---------------------------------------------|----------------------------------|----------------------------------------------------------------------------------------------|----------------------------------------------------------------------------------------------------|-----------------------|
| <i>Characteristics</i>                      |                                  |                                                                                              |                                                                                                    |                       |
| <i>Study Site</i>                           |                                  |                                                                                              |                                                                                                    | <0.0001               |
| A                                           | 4794                             | 38 (0.8)                                                                                     | 4756 (99.2)                                                                                        |                       |
| B                                           | 7434                             | 106 (1.4)                                                                                    | 7328 (98.6)                                                                                        |                       |
| C                                           | 5964                             | 29 (0.5)                                                                                     | 5935 (99.5)                                                                                        |                       |
| <i>Infant Sex</i>                           |                                  |                                                                                              |                                                                                                    | 0.66                  |
| Male                                        | 9345                             | 93 (1.0)                                                                                     | 9252 (99.0)                                                                                        |                       |
| Female                                      | 8842                             | 80 (0.9)                                                                                     | 8762 (99.1)                                                                                        |                       |
| Unknown                                     | 5                                | 0 (0.0)                                                                                      | 5 (100)                                                                                            |                       |
| <i>Maternal Race/Ethnicity</i> <sup>b</sup> |                                  |                                                                                              |                                                                                                    | <0.0001               |



|                                             |       |           |              |         |
|---------------------------------------------|-------|-----------|--------------|---------|
| Non-Hispanic White                          | 7583  | 32 (0.4)  | 7551 (99.6)  |         |
| Non-Hispanic Black                          | 1871  | 25 (1.3)  | 1846 (98.7)  |         |
| Hispanic                                    | 5112  | 81 (1.6)  | 5031 (98.4)  |         |
| Other                                       | 3318  | 30 (0.9)  | 3288 (99.1)  |         |
| Unknown                                     | 308   | 5 (1.6)   | 303 (98.4)   |         |
| <i>Maternal Medicaid</i>                    |       |           |              | 0.05    |
| Yes                                         | 4085  | 51 (1.2)  | 4034 (98.8)  |         |
| No                                          | 13947 | 120 (0.9) | 13827 (99.1) |         |
| Unknown                                     | 160   | 2 (1.2)   | 158 (98.8)   |         |
| <i>Maternal COVID-19</i>                    |       |           |              | <0.0001 |
| <i>Diagnosis<sup>c</sup></i>                |       |           |              |         |
| No Known COVID-19                           | 17122 | 66 (0.4)  | 17056 (99.6) |         |
| During Pregnancy only                       | 623   | 6 (1.0)   | 617 (99.0)   |         |
| During Post-partum                          | 367   | 99 (27.0) | 268 (73.0)   |         |
| Period                                      |       |           |              |         |
| During Pregnancy and                        | 80    | 2 (2.5)   | 78 (97.5)    |         |
| Post-partum Period                          |       |           |              |         |
| <i>Gestational Age at Birth<sup>d</sup></i> |       |           |              | 0.31    |
| Preterm (< 37 weeks)                        | 1819  | 18 (1.0)  | 1801 (99.0)  |         |
| Term or Post-Term ( $\geq 37$               | 16373 | 155 (1.0) | 16218 (99.0) |         |
| weeks)                                      |       |           |              |         |
| <i>Any Underlying Medical Conditions</i>    |       |           |              |         |
| Infant <sup>e</sup>                         |       |           |              |         |

|                             |       |           |              |       |
|-----------------------------|-------|-----------|--------------|-------|
| Yes                         | 1327  | 21 (1.6)  | 1306 (98.4)  | 0.02  |
| No                          | 16865 | 152 (0.9) | 16713 (99.1) |       |
| <b>Maternal<sup>e</sup></b> |       |           |              |       |
| Yes                         | 10320 | 91 (0.9)  | 10229 (99.1) | 0.001 |
| No                          | 7872  | 82 (1.0)  | 7790 (99.0)  |       |

<sup>a</sup> Unadjusted chi-square and fisher's exact test p-values of  $\leq 0.05$  were considered statistically significant.

<sup>b</sup> Race/Ethnicity was extracted from medical records.

<sup>c</sup> Maternal COVID-19 diagnosis was based on a recorded COVID-19 diagnosis (ICD-10: U07.1) or a recorded visit with confirmed SARS-CoV-2 infection by any method (RT-PCR, antigen, etc.) based on hospital records at any time during the pregnancy or during the six months after delivery.

<sup>d</sup> Gestational age at delivery (preterm [ $<37$  weeks], term [ $37-42$  weeks], or post-term [ $>42$  weeks]) was determined using reported gestational age at delivery or derived based on delivery date and estimated date of conception.

<sup>e</sup> Definition of any underlying medical conditions for mothers and infants can be found in Appendix.

**Table 2.** Incidence rates<sup>a</sup> per 1,000 person-weeks of medically attended COVID-19 episodes among infants under 6 months of age born to mothers in the eESPI cohort, Epidemiology of SARS-CoV-2 in Pregnancy and Infancy (ESPI) Network: Electronic Cohort (eESPI) (N=173).

|                                               | Infants with<br>Medically<br>Attended<br>COVID-19<br>Episodes | Person-Weeks <sup>b</sup> | Incidence Rates per 1,000<br>Person-Weeks, 95% CI |
|-----------------------------------------------|---------------------------------------------------------------|---------------------------|---------------------------------------------------|
| <i>Characteristics</i>                        |                                                               |                           |                                                   |
| <i>Overall incidence rate</i>                 | 173                                                           | 307059.86                 | 0.6 (0.5 – 0.6)                                   |
| <i>SARS-CoV-2<br/>Circulation<sup>c</sup></i> |                                                               |                           |                                                   |
| Low                                           | 90                                                            | 188198.86                 | 0.4 (0.3 – 0.5)                                   |
| High                                          | 83                                                            | 111843.71                 | 0.6 (0.5 – 0.8)                                   |
| <i>Infant Age<sup>d</sup></i>                 |                                                               |                           |                                                   |
| Under 1 month                                 | 27                                                            | 67648.00                  | 2.0 (1.7 – 2.5)                                   |
| 1 month                                       | 29                                                            | 58250.57                  | 2.0 (1.6 – 2.4)                                   |
| 2 months                                      | 28                                                            | 50772.86                  | 1.6 (1.3 – 2.1)                                   |
| 3 months                                      | 16                                                            | 45530.00                  | 1.3 (0.9 – 1.8)                                   |
| 4 months                                      | 31                                                            | 40628.14                  | 1.2 (0.8 – 1.7)                                   |
| 5 months                                      | 42                                                            | 36421.71                  | 0.7 (0.4 – 1.2)                                   |
| <i>Infant Sex</i>                             |                                                               |                           |                                                   |

|                                            |     |           |                   |
|--------------------------------------------|-----|-----------|-------------------|
| Male                                       | 93  | 158088.57 | 0.5 (0.4 – 0.6)   |
| Female                                     | 80  | 148922.00 | 0.5 (0.4 – 0.6)   |
| <i>Maternal Race/Ethnicity<sup>e</sup></i> |     |           |                   |
| Non-Hispanic White                         | 32  | 129786.29 | 0.2 (0.1 – 0.3)   |
| Non-Hispanic Black                         | 25  | 28971.43  | 0.9 (0.6 – 1.4)   |
| Hispanic                                   | 81  | 82956.29  | 0.9 (0.7 – 1.1)   |
| Other                                      | 30  | 59839.57  | 0.3 (0.2 – 0.5)   |
| Unknown                                    | 5   | 5506.29   | 0.6 (0.3 – 1.5)   |
| <i>Maternal Medicaid</i>                   |     |           |                   |
| Yes                                        | 51  | 64885.86  | 0.8 (0.6 – 1.1)   |
| No                                         | 120 | 239298.14 | 0.4 (0.3 – 0.5)   |
| Unknown                                    | 2   | 2875.86   | 0.6 (0.1 – 2.2)   |
| <i>Maternal COVID-19</i>                   |     |           |                   |
| <i>Diagnosis<sup>f</sup></i>               |     |           |                   |
| During Pregnancy only                      | 6   | 6761.43   | 0.5 (0.2 – 1.5)   |
|                                            |     | 7412.00   |                   |
| During Post-partum Period                  | 99  | 1187.57   | 12.5 (9.8 – 16.0) |
|                                            |     | 291698.86 |                   |
| During Pregnancy and Post-partum Period    | 2   |           | 1.6 (0.4 – 6.3)   |
| No known COVID-19                          | 66  |           | 0.2 (0.2 – 0.3)   |

*Any Underlying Medical*

*Conditions*

Infant<sup>g</sup>

|     |     |           |                 |
|-----|-----|-----------|-----------------|
| Yes | 21  | 24417.29  | 0.7 (0.4 – 1.1) |
| No  | 152 | 282642.57 | 0.5 (0.4 – 0.6) |

Maternal<sup>h</sup>

|     |    |           |                 |
|-----|----|-----------|-----------------|
| Yes | 91 | 174994.14 | 0.5 (0.4 – 0.6) |
| No  | 82 | 132065.71 | 0.5 (0.4 – 0.6) |

<sup>a</sup> Overall incidence rate is a crude aggregate incidence rate. Incidence rates by circulation period and infant and maternal characteristics are site-adjusted.

<sup>b</sup> Person-week for all infants <6 months of age born to mothers in the eESPI cohort.

<sup>c</sup> High and low SARS-CoV-2 circulation weeks were defined for each site as weeks with case counts above the median case count (high) or below the median case count (low) for the study period, using Health and Human Services (HHS) representative county-level surveillance data for Texas (Harris County), Oregon (Multnomah County), and California (Santa Clara County) in each health system’s service area (HHS 2021).

<sup>d</sup> Infant age was defined as 0-30 days (< 1 month old); 31-60 days (1 month); 61-90 days (2 months); 91-120 days (3 months); 121-150 (4 months); 151-185 days (5 months).

<sup>e</sup> Race/Ethnicity was extracted from medical records.

<sup>f</sup> Medically attended maternal COVID-19 was based on a recorded COVID-19 diagnosis (ICD-10: U07.1) or a recorded visit with confirmed SARS-CoV-2 by any method (RT-PCR, antigen, etc.) based on hospital records at any time during the pregnancy or during the six months after delivery.

<sup>g</sup> Infant age was defined as 0-30 days (< 1 month old); 31-60 days (1 month); 61-90 days (2 months); 91-120 days (3 months); 121-150 (4 months); 151-185 days (5 months).

<sup>h</sup> Medically attended maternal COVID-19 was based on a recorded COVID-19 diagnosis (ICD-10: U07.1) or a recorded visit with confirmed SARS-CoV-2 by any method (RT-PCR, antigen, etc.) based on hospital records at any time during the pregnancy or during the six months after delivery.

## Appendix A: Data Dictionary

| Variable                                              | ESPI Variable                                                     | Variable Description                                                                                                    | ICD-10 Codes                                                                                                                                                                                               |
|-------------------------------------------------------|-------------------------------------------------------------------|-------------------------------------------------------------------------------------------------------------------------|------------------------------------------------------------------------------------------------------------------------------------------------------------------------------------------------------------|
| Medically Attended Infant COVID-19                    | IN_COVID_CONF_VTST# OR IN_ARFI_COVID                              | Confirmed SARS-CoV-2 by any method for any test for neonate OR Identifies COVID-19 diagnosis code                       | ICD-10: U07.1                                                                                                                                                                                              |
| Medically Attended Maternal COVID-19 during Pregnancy | PR_COVID_CONF_VTST# OR PR_ARFI_COVID                              | Confirmed SARS-CoV-2 by any method for any test during pregnancy OR Identifies COVID-19 diagnosis code during pregnancy | ICD-10: U07.1                                                                                                                                                                                              |
| Medically Attended Maternal COVID-19 post-partum      | PP_COVID_CONF_VTST# OR PP_ARFI_COVID                              | Confirmed SARS-CoV-2 by any method for any test OR Identifies COVID-19 diagnosis code post-partum                       | ICD-10: U07.1                                                                                                                                                                                              |
| Maternal Race/Ethnicity                               | Calculated based on responses to PR_MAT_ETHNICITY AND PR_MAT_RACE | Maternal race and Maternal ethnicity                                                                                    | No codes                                                                                                                                                                                                   |
| Maternal Medicaid                                     | PR_MAT_MEDICAID                                                   | Maternal status for Medicaid coverage                                                                                   | No codes                                                                                                                                                                                                   |
| Gestational Age                                       | PR_PREG_GA_DEL_NEO# or if blank calculated based on               | Gestational age at delivery date                                                                                        | ESPI derived from DELIVERY_DT_NEO#, FIRST_US_DT, GA_FIRST_US                                                                                                                                               |
|                                                       | PR_DELIVERY_DT_NEO                                                | Date of delivery/End of Pregnancy                                                                                       | This should be considered as End of Pregnancy date, ie, if the pregnancy ends in a way other than a delivery (eg, miscarriage, abortion), the date of that outcome should be recorded under this variable. |
|                                                       | PR_EST_CONCEPTION                                                 | Estimated date of conception                                                                                            | ESPI calculated from EST_DELIVERY: EST_CONCEPTION = (EST_DELIVERY – 280)                                                                                                                                   |

|                                |                                                                           |                                                                                                      |                                                                                                                                                                                                  |
|--------------------------------|---------------------------------------------------------------------------|------------------------------------------------------------------------------------------------------|--------------------------------------------------------------------------------------------------------------------------------------------------------------------------------------------------|
| Infant Underlying Conditions   | IN_HR_CONDITION_PL                                                        | High risk medical condition (chronic condition, not pregnancy complication)                          | See appendix B.                                                                                                                                                                                  |
| Maternal Underlying Conditions | PR_HR_CONDITION_PL                                                        | High risk medical condition (chronic condition, not pregnancy complication)                          | See appendix B.                                                                                                                                                                                  |
| Timing of Maternal COVID-19    | IF PR_COVID_CONF_VTST# OR PR_ARFI_COVID then COVID during pregnancy.      |                                                                                                      | ICD-10: U07.1                                                                                                                                                                                    |
|                                | IF PP_COVID_CONF_VTST# OR PP_ARFI_COVID then COVID-19 during post-partum. |                                                                                                      | ICD-10: U07.1                                                                                                                                                                                    |
| Infant Hospitalization         | IN_HOSP_ADM_DT                                                            | Hospital admission date                                                                              |                                                                                                                                                                                                  |
| Infant Death                   | INF_DEATH                                                                 | Infant Death                                                                                         |                                                                                                                                                                                                  |
| Live Birth                     | Calculated based on responses to PR_OUT_STILLBIRTH_NEO#                   | Stillborn infant (infant born >=20 weeks gestation with no sign of life) [multiple fetuses/neonates] | O60.1; O60.10; O60.12; O60.13; O60.14; P07.21; P07.22; P07.23; P07.24; P07.25; P07.26; P07.3; P07.30; P07.31; P07.32; P07.33; P07.34; P07.35; P07.36; P07.37; P07.38; P07.39                     |
|                                | PR_PREG_GA_DEL_NEO#/<br>PREG_GA_DEL_EX_NEO/<br>PREG_GA_DEL_ANALYTIC_NEO#  | Gestational age at delivery date                                                                     | Derived or extracted from Medical Records.<br><br>For Baylor:<br>PREG_GA_DEL_ANALYTIC_NEO# =<br>PREG_GA_DEL_EX_NEO#<br><br>For KPNW and KPNC:<br>PREG_GA_DEL_ANALYTIC_NEO# =<br>PREG_GA_DEL_NEO# |
|                                | PR_OUT_ABORTION_NEO                                                       | Induced termination of pregnancy                                                                     | Z33.2, O04.80.                                                                                                                                                                                   |
|                                | PR_OUT_PRETERM_NEO                                                        | Preterm birth (A live birth with an estimated gestation <37 weeks) [multiple fetuses/neonates]       | O60.1; O60.10; O60.12; O60.13; O60.14; P07.21; P07.22; P07.23; P07.24; P07.25; P07.26; P07.3; P07.30; P07.31; P07.32; P07.33; P07.34; P07.35;                                                    |



|                                              |                         |                                            |                                                                                                                                                                                                                                                                                                                                                           |
|----------------------------------------------|-------------------------|--------------------------------------------|-----------------------------------------------------------------------------------------------------------------------------------------------------------------------------------------------------------------------------------------------------------------------------------------------------------------------------------------------------------|
|                                              |                         |                                            | P07.36; P07.37; P07.38; P07.39                                                                                                                                                                                                                                                                                                                            |
|                                              | OUT_LIVEBIRTH_NEO       | Live birth                                 |                                                                                                                                                                                                                                                                                                                                                           |
|                                              | PR_OUT_MISCARRIAGE_NEO  |                                            |                                                                                                                                                                                                                                                                                                                                                           |
| Infant Heart<br>*NAC = Non-Acute; AC = Acute | IN_HR_AC_HEART_FAIL_VL  | (Acute or chronic) heart failure diagnosis | ICD-10: I50.21, I50.23, I50.31, I50.33, I50.41, I50.43                                                                                                                                                                                                                                                                                                    |
|                                              | IN_HR_AC_HEART_VL       | Acute heart disease diagnosis              | ICD-10: I40, J10.82, J11.82, I30, I31.4, R57.0, I50.21, I50.23, I50.31, I50.33, I50.41, I50.43, I50.811, I50.813, I16, I10, I11, I11.9, I11.0, I15, I15.0, I15.9, I16.0, I16.1, I16.9, I20.0, I21, I21.0, I21.1, I21.2, I21.3, I21.4, I21.9, I22, I22.0, I22.1, I22.2, I22.8, I22.9, I24                                                                  |
|                                              | IN_HR_CARD_ARRST_VL     | Cardiac arrest diagnosis                   | ICD-10: I46.9                                                                                                                                                                                                                                                                                                                                             |
|                                              | IN_HR_HEART_FAIL_VL     | (Acute or chronic) heart failure diagnosis | ICD-10: I50                                                                                                                                                                                                                                                                                                                                               |
|                                              | IN_HR_NAC_HEART_VL      | Non-acute heart disease diagnosis          | ICD-10: A52.0, H35.031-039, I01, I09.2, I05-08, I34, I35, I36, I37, I09, I12, I13, I23, I25-28, I33, I31 (except I31.4), I38, I39, I42-44, I46, I47, I48, I49, I50.1, I50.9, I41, I51, I52, I70, I71, I72, I73, I74, I75, M30.0, M31, I77, I79, I97.0, I97.1, Q21-27, T82, Z95, Q20, Q27.0, Q27.3, Q27.4, Q27.8, Q27.9, Q28, Q89.3, R00.1, Z98.61, Z79.82 |
| Infant Liver<br>*NAC = Non-Acute; AC = Acute | IN_HR_LIVER_VL          | (Acute or chronic) Liver disease diagnosis | ICD-10: K70, K73, K74, K75.1-K75.9, I85, K71, K72, K75, K76, K77                                                                                                                                                                                                                                                                                          |
|                                              | IN_HR_NAC_LIVER_FAIL_VL | (Non-acute) liver failure diagnosis        | ICD-10: K72.1, K76.2                                                                                                                                                                                                                                                                                                                                      |
|                                              | IN_HR_AC_LIVER_FAIL_VL  | Acute liver failure diagnosis              | ICD-10: K72.0, K76.3                                                                                                                                                                                                                                                                                                                                      |
| Infant Lung                                  | IN_HR_OLUNG_VL          | Lung disease diagnosis, not asthma         | ICD-10: A15, A17, A18, A19, A31, D86, E84, J40, J41, J42, J43, J47, J60, J61, J62.0, J62.8, J63.6, J64, J67, J68, J69.0, J69.1, J69.8, J70.9,                                                                                                                                                                                                             |

|  |  |  |                                                                                                                                                                                                      |
|--|--|--|------------------------------------------------------------------------------------------------------------------------------------------------------------------------------------------------------|
|  |  |  | J85, J93, J98, M34, M35, Q34, R09.1, A31.0, B39, B40., B41, B44, B45, B46.0, D86.0, E88.01, J62, J63, J65, J66, J69, J70, J82, J84, J86, J95.0, J96, J98.1, J99, P25, P26, P27, P28, Q33, T86.8, J44 |
|--|--|--|------------------------------------------------------------------------------------------------------------------------------------------------------------------------------------------------------|

## Appendix B: List of High-Risk Medical Conditions

This set of variables looks at whether each participant had different high-risk medical conditions in diagnosis codes across every visit or admission within the time window for the pull. Each visit or admission for the participant will be evaluated for whether it included one of the listed ICD-10 codes. If any visit/admission for the participant across the entire time window did include one of the ICD-10 codes in question, the variable will be equal to 1 (One or more codes listed). If not, the variable will be equal to 0 (No code listed).

| ESPI Variable                      | Variable Description                                                                                                     | ICD-19 Codes                                                                                                                       |
|------------------------------------|--------------------------------------------------------------------------------------------------------------------------|------------------------------------------------------------------------------------------------------------------------------------|
| IN_HR_EXCLD_ANEMIA_PL <sup>a</sup> | High risk medical condition (chronic condition, not pregnancy complication) for Infant excluding Anemia                  | Presence of any of the conditions listed below.                                                                                    |
| PR_HR_EXCLD_ANEMIA_PL <sup>b</sup> | High risk medical condition (chronic condition, not pregnancy complication) for Mother during pregnancy excluding Anemia | Presence of any of the conditions listed below.                                                                                    |
| HR_BLOOD_PL                        | Blood disorder diagnosis                                                                                                 | ICD-10: D50.0, D50.8, D50.9, D51, D52, D53, D55-61, D64.0-3, D63.1, D63.0, D63.8, D64.4, D64.8, D64.81, D64.89, D64.9, D66-75, D77 |

|                          |                                              |                                                                                                                                                                                                                                                                                                                                                                                                                                                                                                                                                                    |
|--------------------------|----------------------------------------------|--------------------------------------------------------------------------------------------------------------------------------------------------------------------------------------------------------------------------------------------------------------------------------------------------------------------------------------------------------------------------------------------------------------------------------------------------------------------------------------------------------------------------------------------------------------------|
| HR_BLOOD_EXCLD_ANEMIA_PL | Blood disorder diagnosis (other than anemia) | ICD-10: D56-61, D64.0-4, D64.8, D63.1, D63.0, D63.8, D64.81, D66-75, D77                                                                                                                                                                                                                                                                                                                                                                                                                                                                                           |
| HR_DIABT_PL              | Diabetes diagnosis                           | ICD-10: E08-E11                                                                                                                                                                                                                                                                                                                                                                                                                                                                                                                                                    |
| HR_AC_HEART_FAIL_PL      | Acute heart failure diagnosis                | ICD-10: I50.21, I50.23, I50.31, I50.33, I50.41, I50.43                                                                                                                                                                                                                                                                                                                                                                                                                                                                                                             |
| HR_HEART_FAIL_PL         | (Acute or chronic) heart failure diagnosis   | ICD-10: I50                                                                                                                                                                                                                                                                                                                                                                                                                                                                                                                                                        |
| HR_CARD_ARRST_PL         | Cardiac arrest diagnosis                     | ICD-10: I46.9                                                                                                                                                                                                                                                                                                                                                                                                                                                                                                                                                      |
| HR_AC_HEART_PL           | Acute heart disease diagnosis                | ICD-10: I40, J10.82, J11.82, I30, I31.4, R57.0, I50.21, I50.23, I50.31, I50.33, I50.41, I50.43, I50.811, I50.813, I16, I10, I11, I11.9, I11.0, I15, I15.0, I15.9, I16.0, I16.1, I16.9, I20.0, I21, I21.0, I21.1, I21.2, I21.3, I21.4, I21.9, I22, I22.0, I22.1, I22.2, I22.8, I22.9, I24                                                                                                                                                                                                                                                                           |
| HR_NAC_HEART_PL          | Non-acute heart disease diagnosis            | ICD-10: A52.0, H35.031-039, I01, I09.2, I05-08, I34, I35, I36, I37, I09, I12, I13, I23, I25-28, I33, I31 (except I31.4), I38, I39, I42-44, I46, I47, I48, I49, I50.1, I50.9, I41, I51, I52, I70, I71, I72, I73, I74, I75, M30.0, M31, I77, I79, I97.0, I97.1, Q21-27, T82, Z95, Q20, Q27.0, Q27.3, Q27.4, Q27.8, Q27.9, Q28, Q89.3, R00.1, Z98.61, Z79.82                                                                                                                                                                                                          |
| HR_CANCER_PL             | Cancer diagnosis                             | ICD-10: C00, C01, C02, C07, C08, C03, C04, C05, C06, C09, C10, C11, C12, C13, C14, C15, C16, C17, C18, C19, C20, C21, C22, C23, C24, C25, C48, C26, C30, C31, C32, C33, C34, C38, C37, C39, C40, C41, C44, C49, C43, C50, C46, C55, C53, C58, C54, C56, C51, C52, C61, C62, C60, C67, C64, C69, C71, C72, C73, C74, C75, C76, C77, C78, C79, C80, C81, C83, C90, C91, C92, C93, C94, C95, C7A, D02, D37-44, D48, Z51.11, Z51.12, C47, C4A, C57, C65, C66, C68, C70, C7B, D03, Z85, M36.0, Z51.0, Z51.1, C95.00, C95.10, D61.0, D61.2, C82, C84, C85, C86, C88, C96 |
| HR_IMMUNE_PL             | Immune disorder diagnosis                    | ICD-10: B20, B33.3, B59, D73, G70.8, M32.10, M35, M05, M06, R82.8, R84.7, R85.7, R87.7, R89.7, T45, Z21, Z94, B97.3, D47.Z1, D76, M07, M35.0, M35.9, Q89.0, T45.1X1, T86.1, T86.2, T86.3, T86.4, T86.81, T86.85, Z48.2, Z94.0, Z94.1, Z94.2, Z94.3, Z94.4, Z94.82, Z94.83, Z94.84, T86.0, T86.5, D80, D81, D82, D83, D84, D89, D89.81, M08, L40, M32, M30, M33, D46, Z79.5, Z79.52, B97.35, O98.7, D61.9, D73.0                                                                                                                                                    |
| HR_AC_RENAL_FAIL_PL      | Acute renal failure diagnosis                | ICD-10: N17, N01                                                                                                                                                                                                                                                                                                                                                                                                                                                                                                                                                   |
| HR_NAC_RENAL_FAIL_PL     | (Non-acute) Renal failure diagnosis          | ICD-10: I13.11, I13.2, K76.7, D63.1, I12.0, I13.11, I13.2, N03, N04, N18, N19, N26.9, N25.0, N25.1, N27.0, N27.1, N27.9, N28.89, Q61, Z49, Z91.15, N02, N06, N07, N08, N11, N14, N15, N16, N25, N26, N28, Q27.1, Q27.2, Q60, Z99.2                                                                                                                                                                                                                                                                                                                                 |

|                       |                                               |                                                                                                                                                                                                                                                                                                                                                                           |
|-----------------------|-----------------------------------------------|---------------------------------------------------------------------------------------------------------------------------------------------------------------------------------------------------------------------------------------------------------------------------------------------------------------------------------------------------------------------------|
| HR_AC_LIVER_FAIL_PL   | Acute liver failure diagnosis                 | ICD-10: K72.0, K76.3                                                                                                                                                                                                                                                                                                                                                      |
| HR_NAC_LIVER_FAIL_PL  | (Non-acute) liver failure diagnosis           | ICD-10: K72.1, K76.2                                                                                                                                                                                                                                                                                                                                                      |
| HR_LIVER_PL           | (Acute or chronic) Liver disease diagnosis    | ICD-10: K70, K73, K74, K75.1-K75.9, I85, K71, K72, K75, K76, K77                                                                                                                                                                                                                                                                                                          |
| HR_ASTHMA_PL          | Asthma diagnosis                              | ICD-10: J45                                                                                                                                                                                                                                                                                                                                                               |
| HR_OLUNG_PL           | Lung disease diagnosis, not asthma            | ICD-10: A15, A17, A18, A19, A31, D86, E84, J40, J41, J42, J43, J47, J60, J61, J62.0, J62.8, J63.6, J64, J67, J68, J69.0, J69.1, J69.8, J70.9, J85, J93, J98, M34, M35, Q34, R09.1, A31.0, B39, B40., B41, B44, B45, B46.0, D86.0, E88.01, J62, J63, J65, J66, J69, J70, J82, J84, J86, J95.0, J96, J98.1, J99, P25, P26, P27, P28, Q33, T86.8, J44                        |
| HR_OBESE_PL           | Obesity diagnosis                             | ICD-10: E66, O99.210-215, O99.840-845, Z68.4                                                                                                                                                                                                                                                                                                                              |
| HR_SEV_OBESE_PL       | Severe (morbid) obesity dx                    | ICD-10: E66.01                                                                                                                                                                                                                                                                                                                                                            |
| HR_OMETBOL_PL         | Metabolic disorder diagnosis not obesity      | ICD-10: E03-E07, E22, E23, E32, E27, E40-E46, E50-E56, E70-E72, E74, E78, E88, M10, E83, E75.2, E76, E77, E79, E80, E85, E89.1, E89.6, E01, E20, E21, E24, E25, E26, E28, E31, E34                                                                                                                                                                                        |
| HR_ALT_MENT_PL        | Altered mental status diagnosis               | ICD-10: F05, F06.0, F06.1, F06.2, F06.30, F06.4, F06.8, G45.4, R40.0, R40.4, R41.82, R44.0, R41                                                                                                                                                                                                                                                                           |
| HR_ENCEPHAL_PL        | Encephalopathy diagnosis                      | ICD-10: G93.4, I67.4, K72.90, K72.91                                                                                                                                                                                                                                                                                                                                      |
| HR_MENINGITIS_PL      | Meningitis diagnosis                          | ICD-10: A02.21, A17.0, A39, A87.0, A87.1, B37.5, B38.4, G00, G01, G02, G03                                                                                                                                                                                                                                                                                                |
| HR_ANOX_BRN_DMG_PL    | Anoxic brain damage diagnosis                 | ICD-10: G93.1                                                                                                                                                                                                                                                                                                                                                             |
| HR_ENCEPH_MYEL_PL     | Encephalitis or myelitis diagnosis            | ICD-10: A39.81, G05, G37.3                                                                                                                                                                                                                                                                                                                                                |
| HR_COMA_PL            | Coma diagnosis                                | ICD-10: R40.20, R40.3                                                                                                                                                                                                                                                                                                                                                     |
| HR_POLYNEURO_PL       | Critical illness polyneuropathy diagnosis     | ICD-10: G62.81                                                                                                                                                                                                                                                                                                                                                            |
| HR_CEREBRAL_INFARC_PL | Cerebral infarction diagnosis                 | ICD-10: G43.6, I63.019, I63.119, I63.139, I63.20, I63.219, I63.22, I63.239, I63.30, I63.40, I63.50, I63.59                                                                                                                                                                                                                                                                |
| HR_CEREBRAL_HEMR_PL   | Cerebral hemorrhage diagnosis                 | ICD-10: I60.9, I61.9, I62                                                                                                                                                                                                                                                                                                                                                 |
| HR_CEREBRAL_EDEMA_PL  | Cerebral edema diagnosis                      | ICD-10: G93.6                                                                                                                                                                                                                                                                                                                                                             |
| HR_NEURO_PL           | Acute or Chronic Neurologic disease diagnosis | ICD-10: A17, A81, B90.0, F01, F02, F03, F07, F71, F72, F73, E75, G20, G25, G26, G11, M47, G60, G35, G36, G81, G80, G82, G40, G93, G96, I02, I60, I61, I62, I65, I66, I67.82, I67.9, I69, G71.13, R56, T85, I68, A17.0, E75.02, E75.19, E75.4, F84.2, G10, G12-14, G21, G23, G24, G30, G31, G32, G37, G45, G46, G63, G64, G70, G71, G73, G83, G90.3, G91, G94, G95, G99.2, |

|                     |                                                                                |                                                                                                                                                                                                                            |
|---------------------|--------------------------------------------------------------------------------|----------------------------------------------------------------------------------------------------------------------------------------------------------------------------------------------------------------------------|
|                     |                                                                                | H49.81, Q05, Q76-79, Q85, Q87.4, Q90-93, Q96, R41, R53.2, R54                                                                                                                                                              |
| HR_AC_NEURO_PL      | Only Acute Neurologic disease diagnosis                                        | ICD-10: G04.0, I63, I67.81, I67.82, G45, G45.4, G36, G04, G05, G61.0, I60-I62, G00-G03                                                                                                                                     |
| HR_ART_VEN_EMBOL_PL | Arterial or venous embolism diagnosis                                          | ICD-10: I74, I76, I82                                                                                                                                                                                                      |
| HR_AC_ENDOCRINE_PL  | Acute endocrine complications                                                  | ICD-10: E08.1, E08.10, E08.11, E09.1, E09.10, E09.11, E10.1, E10.10, E10.11, E11.1, E11.10, E11.11, E13.1, E13.10, E13.11, E08.0, E08.00, E08.01, E09.0, E09.00, E09.01, E11.0, E11.00, E11.01, E13.0, E13.00, E13.01, E05 |
| HR_AC_GASTRO_PL     | Acute gastrointestinal complications                                           | ICD-10: K72.0, B15, B16, B17, B19.0, B19.11, B19.21, K85, J09.X3, J10.2, J11.2                                                                                                                                             |
| HR_AC_HEMATO_PL     | Acute hematological complications                                              | ICD-10: D65, I82.210, I82.290, I82.220, I82.4, I82.6, I82.A1, I82.B1, I82.C1, D76.1, D76.2, D69.3, I26, D57.0, D57.01, D57.02, D57.21, D57.211, D57.212, D57.41, D57.411, D57.412, D57.81, D57.811, D57.812                |
| HR_PULM_EMBOL_PL    | Pulmonary embolism diagnosis                                                   | ICD-10: I26                                                                                                                                                                                                                |
| HR_CARDITIS_PL      | Carditis diagnosis                                                             | ICD-10: A39.50, B37.6, I01.0, I01.1, I01.2, I30, I33, I40, I51.4                                                                                                                                                           |
| HR_DIC_PL           | Defibrination syndrome diagnosis                                               | ICD-10: D65                                                                                                                                                                                                                |
| HR_KETOACIDOSIS_PL  | Ketoacidosis diagnosis                                                         | ICD-10: E08.1, E10.1, E13.1                                                                                                                                                                                                |
| HR_HYPRSMOLRTY_PL   | Hyperosmolarity diagnosis                                                      | ICD-10: E08.0, E11.0, E13.0                                                                                                                                                                                                |
| HR_DIABET_COMA_PL   | Diabetic coma diagnosis                                                        | ICD-10: E08.11, E08.641, E09.11, E09.641, E10.11, E11.01, E11.641, E13.11, E13.641, E15                                                                                                                                    |
| HR_THYRD_STORM_PL   | Thyroid storm diagnosis                                                        | ICD-10: E05.01, E05.11, E05.21, E05.31, E05.41, E05.81, E05.91                                                                                                                                                             |
| HR_RHABDOMYOL_PL    | Rhabdomyolysis diagnosis                                                       | ICD-10: M62.82                                                                                                                                                                                                             |
| HR_MYOSITIS_PL      | Myositis diagnosis                                                             | ICD-10: M60                                                                                                                                                                                                                |
| HR_MYOPATHY_PL      | Critical illness myopathy diagnosis                                            | ICD-10: G72.81                                                                                                                                                                                                             |
| HR_GEST_DIABT_PL    | History of gestational diabetes                                                | ICD-10: Z86.32                                                                                                                                                                                                             |
| HR_CHRONHTN_PL      | Pregnancy complicated by preexisting hypertension with or without preeclampsia | ICD-10: O10 (O10.0 – O10.99), O11 (O11.1 - O11.9)                                                                                                                                                                          |
| HR_PREECL_PL        | Preeclampsia diagnosis during                                                  | ICD-10: O14 (O14.0– O14.05), O14.1 (O14.10– O14.15), O14.2 (O14.20-O14.25), O15 (O15.0-                                                                                                                                    |

|                  |                                                                                                   |                                                                          |
|------------------|---------------------------------------------------------------------------------------------------|--------------------------------------------------------------------------|
|                  | pregnancy or postpartum, with or without severe features, and including superimposed preeclampsia | O15.9), O14.9 (O14.90 – O14.95), O11 (O11.1-O11.9)                       |
| HR_PRCLSEVERE_PL | Preeclampsia with severe features                                                                 | ICD-10: O14.1 (O14.10– O14.15), O14.2 (O14.20-O14.25), O15 (O15.0-O15.9) |
| HR_HELLP_PL      | HELLP syndrome                                                                                    | ICD-10: O14.2 (O14.20-O14.25)                                            |
| HR_GESTHTN_PL    | Gestational hypertension (new onset) without proteinuria                                          | ICD-10: O13 (O13.0-O13.9)                                                |

Any underlying medical conditions for the infant included any blood disorder, diabetes, acute or chronic heart failure diagnosis, cardiac arrest, acute or chronic heart disease (congenital), cancer, immune disorder, acute or non-acute renal failure, acute or non-acute liver failure, liver disease, asthma, lung disease (not asthma), altered mental status, encephalopathy, meningitis, anoxic brain damage, encephalitis or myelitis, coma, critical illness polyneuropathy, cerebral infarction, cerebral hemorrhage, cerebral edema, acute or chronic neurologic disease, arterial or venous embolism diagnosis, acute endocrine complications, acute gastrointestinal complications, acute hematological complications, pulmonary embolism, carditis, defibrillation syndrome, ketoacidosis, hyperosmolarity, diabetic coma, thyroid storm, rhabdomyolysis, myositis, or critical illness myopathy. For pregnant women/mothers, additional conditions included history of gestational diabetes, pregnancy complicated by preexisting hypertension with or without preeclampsia, preeclampsia diagnosis during pregnancy or postpartum, with or without severe features, and including superimposed preeclampsia, preeclampsia with severe features, HELLP syndrome, or gestational hypertension (new onset) without proteinuria.
